# Supplementary material for: Evidence for Active Maintenance of Phylotranscriptomic Hourglass Patterns in Animal and Plant Embryogenesis
Source: PubMed Central journal article supplement — Mol Biol Evol. 2015 Jan 27;32(5):1221–31. doi: 10.1093/molbev/msv012 (PMC4408408; doi:10.1093/molbev/msv012), 2015-01-27
Supplement: supp_msv012_Supplementary_figures.pdf [file supp_msv012_Supplementary_figures.pdf]

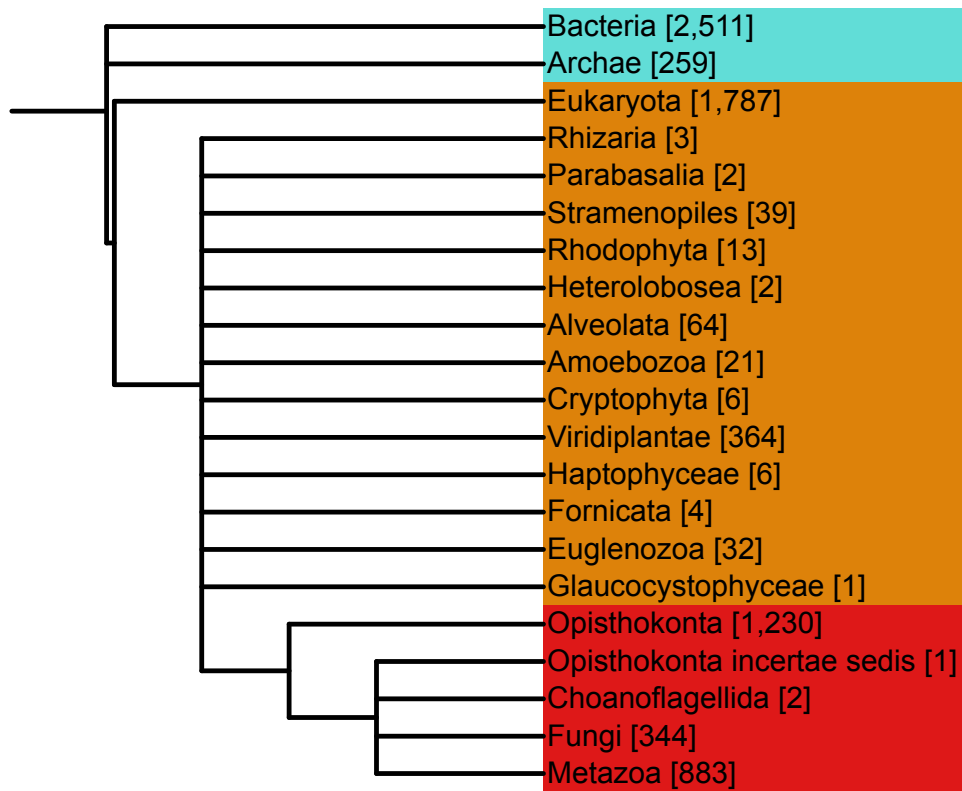

**Supplementary figure S1:** NCBI taxonomy tree representing the major groups of species/genomes used for PS map data base.

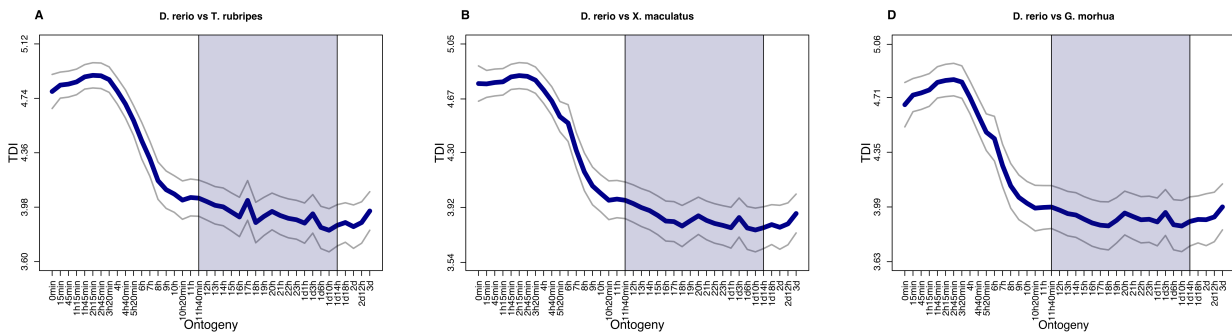

**Supplementary figure S2:** Transcriptome divergence index profiles across *D. rerio* embryogenesis. **A**, *D. rerio* vs *T. rubripes* (P-value red. hourgl. test = 0.504). **B**, *D. rerio* vs *X. maculatus* (P-value red. hourgl. test = 0.36). **C**, *D. rerio* vs *G. morhua* (P-value red. hourgl. test = 0.138). The blue shaded area marks the predicted phylotypic period. The grey lines represent the standard deviation estimated by permutation analysis.

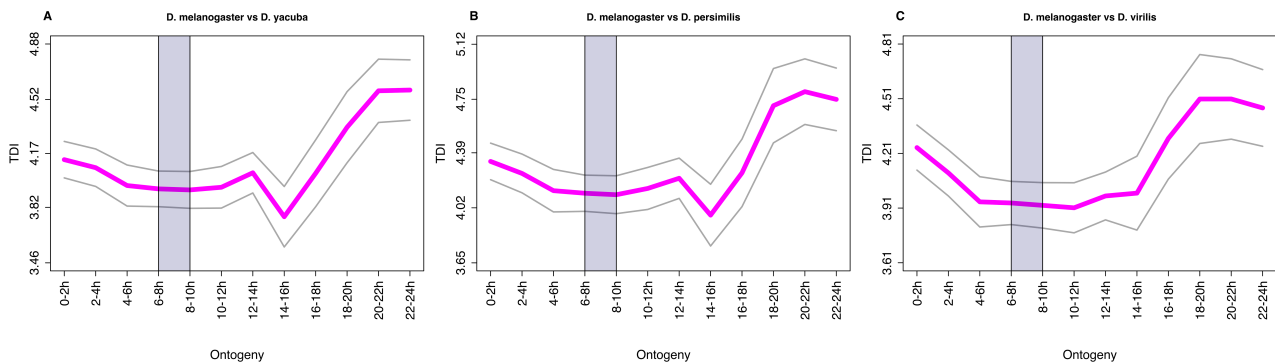

**Supplementary figure S3:** Transcriptome divergence index profiles across *D. melanogaster* embryogenesis. **A**, *D. melanogaster* vs *D. yakuba* (P-value red. hourgl. test = 0.021). **B**, *D. melanogaster* vs *D. persimilis* (P-value red. hourgl. test = 0.0215). **C**, *D. melanogaster* vs *D. virilis* (P-value red. hourgl. test = 0.00713). The blue shaded area marks the predicted phylotypic period. The grey lines represent the standard deviation estimated by permutation analysis.

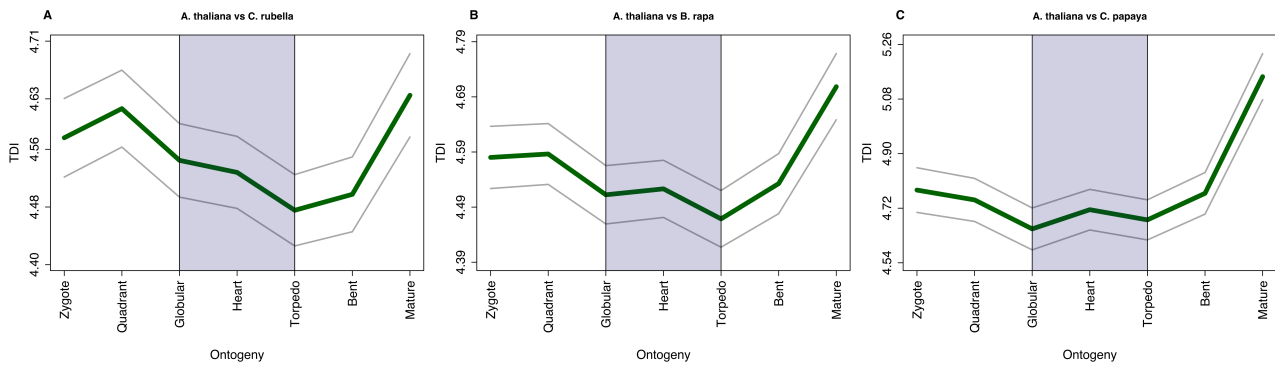

**Supplementary figure S4:** Transcriptome divergence index profiles across *A. thaliana* embryogenesis. **A**, *A. thaliana* vs *C. rubella* (P-value red. hourgl. test = 0.00745). **B**, *A. thaliana* vs *B. rapa* (P-value red. hourgl. test = 0.000249). **C**, *A. thaliana* vs *C. papaya* (P-value red. hourgl. test = 0.00239). The blue shaded area marks the predicted phylotypic period. The grey lines represent the standard deviation estimated by permutation analysis.

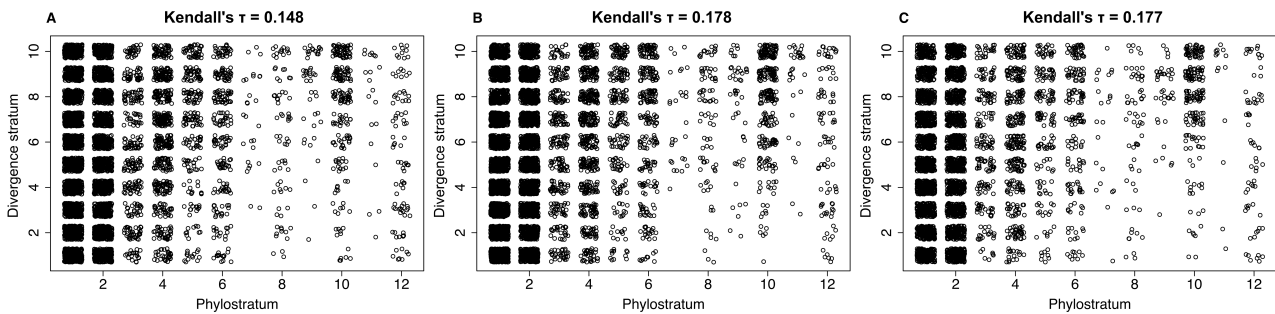

**Supplementary figure S5:** Correlation between phylostrata and divergence strata. Scatter plots of phylostratum vs. divergence stratum over all genes of *D. rerio*.  $K_a / K_s$  ratios for divergence stratum assignment are derived from orthologous genes between **A**, *D. rerio* vs *T. rubripes*. **B**, *D. rerio* vs *X. maculatus*. **C**, *D. rerio* vs *G. morhua*. Kendall  $\tau$  values denote the Kendall rank correlation coefficients measuring the association between both parameters.

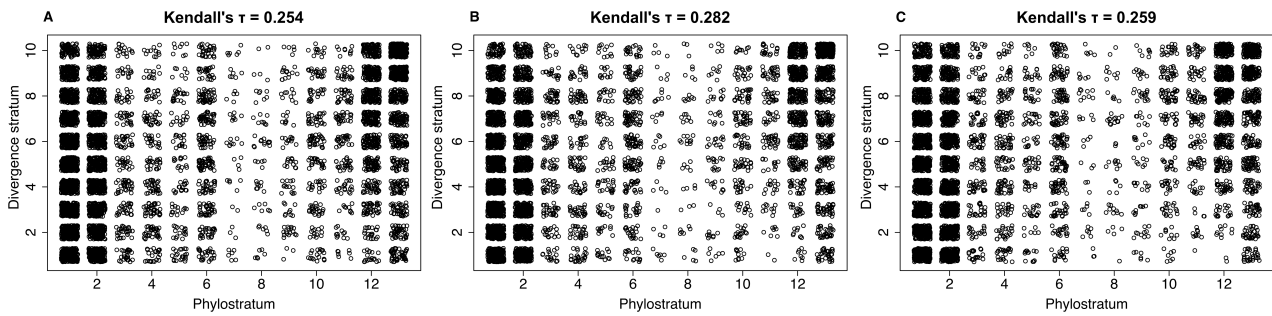

**Supplementary figure S6:** Correlation between phylostrata and divergence strata. Scatter plots of phylostratum vs. divergence stratum over all genes of *D. melanogaster*.  $K_a / K_s$  ratios for divergence stratum assignment are derived from orthologous genes between **A**, *D. melanogaster* vs *D. yakuba*. **B**, *D. melanogaster* vs *D. persimilis*. **C**, *D. melanogaster* vs *D. virilis*. Kendall  $\tau$  values denote the Kendall rank correlation coefficients measuring the association between both parameters.

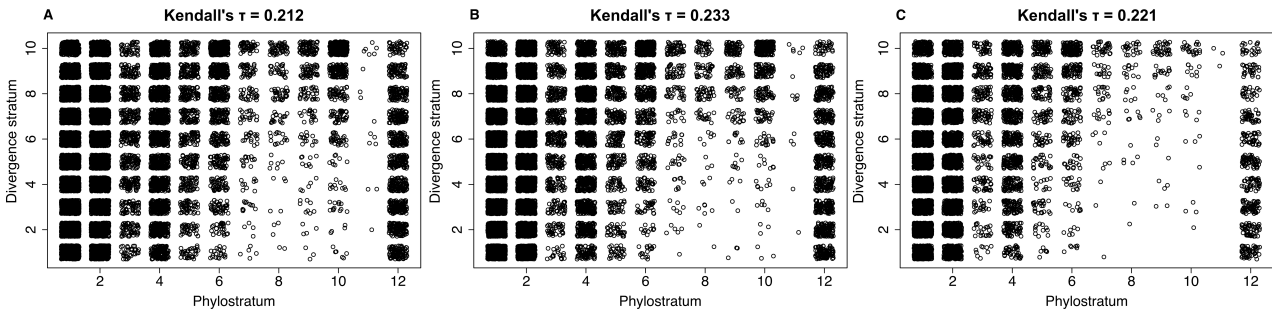

**Supplementary figure S7:** Correlation between phylostrata and divergence strata. Scatter plots of phylostratum vs. divergence stratum over all genes of *A. thaliana*.  $K_a / K_s$  ratios for divergence stratum assignment are derived from orthologous genes between **A**, *A. thaliana* vs *C. rubella*. **B**, *A. thaliana* vs *B. rapa*. **C**, *A. thaliana* vs *C. papaya*. Kendall  $\tau$  values denote the Kendall rank correlation coefficients measuring the association between both parameters.

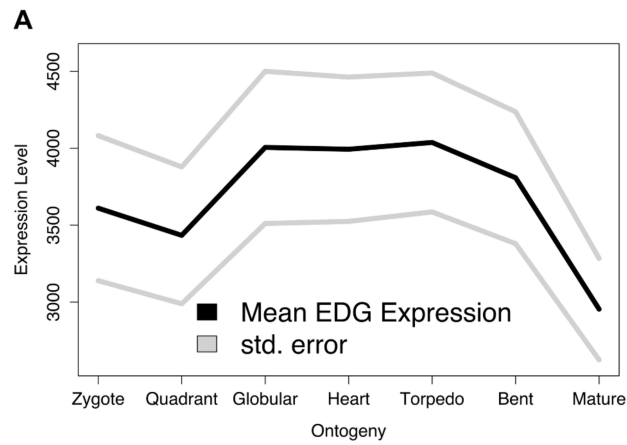

**B**

| Stage | Z     | Q     | G     | H     | T     | B     |
|-------|-------|-------|-------|-------|-------|-------|
| Q     | 0.458 |       |       |       |       |       |
| G     | 0.021 | 0.029 |       |       |       |       |
| H     | 0.008 | 0.007 | 0.356 |       |       |       |
| T     | 0.009 | 0.008 | 0.291 | 0.421 |       |       |
| B     | 0.006 | 0.007 | 0.313 | 0.440 | 0.463 |       |
| M     | 0.275 | 0.320 | 0.116 | 0.037 | 0.023 | 0.028 |

**Supplementary figure S8:** Expression patterns of essential genes during *A. thaliana* embryogenesis. **A**, Mean expression levels of essential genes (embryo defective genes = EDGs) throughout *A. thaliana* embryogenesis. A Kruskal-Wallis rank sum test was performed to test the statistical significance of different gene expression levels between developmental stages ( $P < 0.005$ ). **B**, Results of Dunn's test of multiple comparison using Benjamini-Hochberg adjustment.

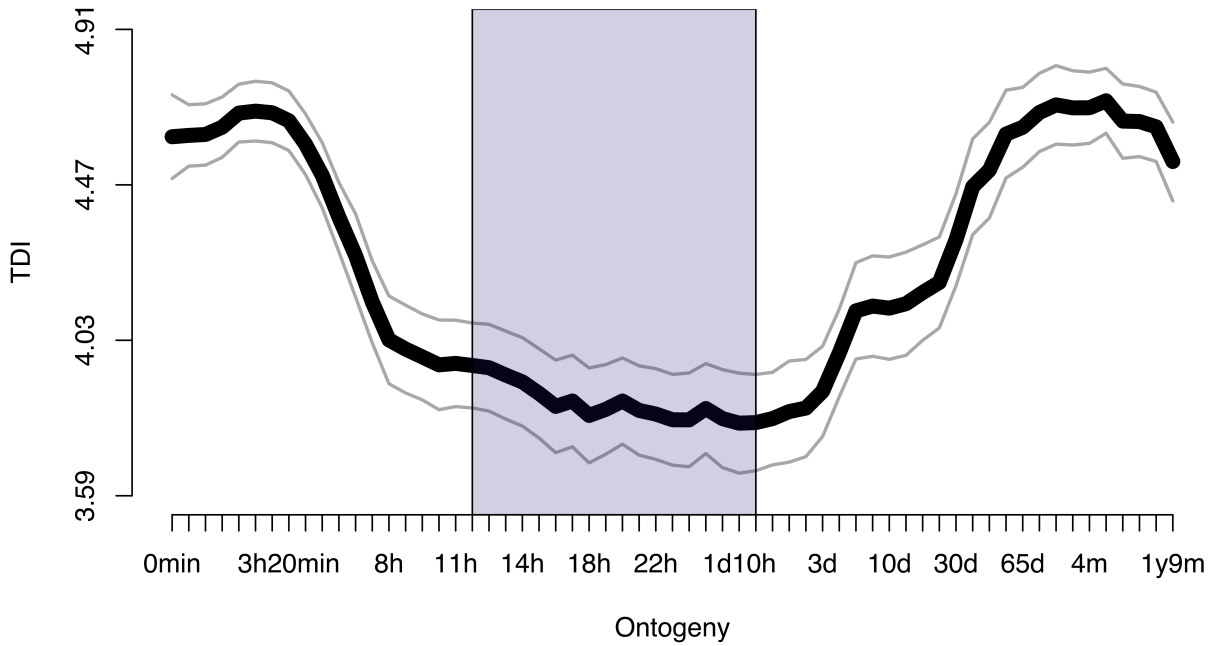

**Supplementary figure S9:** Transcriptome divergence index profiles across *D. rerio* ontogeny starting from unfertilized egg to adult stages based on the complete developmental data set of Domazet-Lošo and Tautz (2010). DS computations are based on *D. rerio* vs *A. mexicanus* (P-value red. hourgl. test =  $6.49e-19$ ). The blue shaded area marks the predicted phylotypic period. The grey lines represent the standard deviation estimated by permutation analysis.

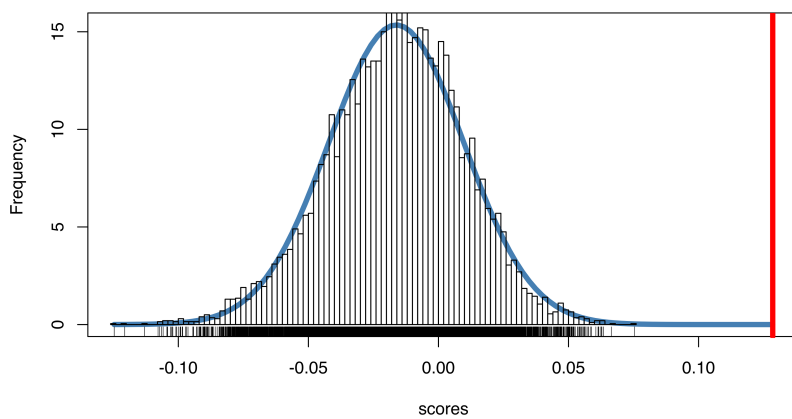

**Supplementary figure S10:** Frequency distribution of 10,000 randomly permuted reductive hourglass scores  $D_{\min}$  that has been used to compute the P-value returned by the reductive hourglass test for the TAI profile of *A. thaliana*. The corresponding frequency distribution was fitted by a gaussian distribution and the red line visualizes the reductive hourglass score of the observed TAI profile of *A. thaliana*.
